# Supplementary material
Source: HighWire-hosted journal article supplement (https://www.cmajopen.ca/highwire/filestream/81053/field_highwire_adjunct_files/3/strobe.pdf)
Supplement: strobe.pdf [file strobe.pdf]

STROBE Statement—Checklist of items that should be included in reports of *cross-sectional studies*

|                          | Item No | Recommendation                                                                                                                                                                       | Section                                                                                                                                                                                                           |
|--------------------------|---------|--------------------------------------------------------------------------------------------------------------------------------------------------------------------------------------|-------------------------------------------------------------------------------------------------------------------------------------------------------------------------------------------------------------------|
| Title and abstract       | 1       | (a) Indicate the study's design with a commonly used term in the title or the abstract                                                                                               | Title: Under the influence: A cross-sectional examination of prevalence and correlates of alcohol and marijuana consumption in relation to youth driving and passenger behaviours in Canada from 2014/2015 CSTADS |
|                          |         | (b) Provide in the abstract an informative and balanced summary of what was done and what was found                                                                                  | Abstract section includes background and objectives, methods, results, and interpretation.                                                                                                                        |
| <b>Introduction</b>      |         |                                                                                                                                                                                      |                                                                                                                                                                                                                   |
| Background/rationale     | 2       | Explain the scientific background and rationale for the investigation being reported                                                                                                 | First 2 paragraphs of introduction.                                                                                                                                                                               |
| Objectives               | 3       | State specific objectives, including any prespecified hypotheses                                                                                                                     | Last paragraph of introduction.                                                                                                                                                                                   |
| <b>Methods</b>           |         |                                                                                                                                                                                      |                                                                                                                                                                                                                   |
| Study design             | 4       | Present key elements of study design early in the paper                                                                                                                              | See Methods section, Design subsection                                                                                                                                                                            |
| Setting                  | 5       | Describe the setting, locations, and relevant dates, including periods of recruitment, exposure, follow-up, and data collection                                                      | See Methods section, Setting subsection.                                                                                                                                                                          |
| Participants             | 6       | (a) Give the eligibility criteria, and the sources and methods of selection of participants                                                                                          | See Methods section, Participants subsection                                                                                                                                                                      |
| Variables                | 7       | Clearly define all outcomes, exposures, predictors, potential confounders, and effect modifiers. Give diagnostic criteria, if applicable                                             | See Methods section, Measures subsection                                                                                                                                                                          |
| Data sources/measurement | 8*      | For each variable of interest, give sources of data and details of methods of assessment (measurement). Describe comparability of assessment methods if there is more than one group | See Methods section, Measures subsection                                                                                                                                                                          |
| Bias                     | 9       | Describe any efforts to address potential sources of bias                                                                                                                            | See: Methods section, Statistical analysis subsection                                                                                                                                                             |
| Study size               | 10      | Explain how the study size was arrived at                                                                                                                                            | See Methods section, Participants subsection                                                                                                                                                                      |
| Quantitative variables   | 11      | Explain how quantitative variables were handled in the analyses. If applicable, describe which groupings were chosen and why                                                         | See Methods section, Measures subsection                                                                                                                                                                          |

|                     |     |                                                                                                                                                                                                              |                                                                                                                 |
|---------------------|-----|--------------------------------------------------------------------------------------------------------------------------------------------------------------------------------------------------------------|-----------------------------------------------------------------------------------------------------------------|
| Statistical methods | 12  | (a) Describe all statistical methods, including those used to control for confounding                                                                                                                        | See Methods section, Statistical Analysis subsection                                                            |
|                     |     | (b) Describe any methods used to examine subgroups and interactions                                                                                                                                          | See Methods section, Statistical Analysis subsection                                                            |
|                     |     | (c) Explain how missing data were addressed                                                                                                                                                                  | See Methods section, Statistical Analysis subsection                                                            |
|                     |     | (d) If applicable, describe analytical methods taking account of sampling strategy                                                                                                                           | See Methods section, Statistical Analysis subsection, particularly weighting section.                           |
|                     |     | (e) Describe any sensitivity analyses                                                                                                                                                                        | We did not conduct sensitivity analyses                                                                         |
| Results             |     |                                                                                                                                                                                                              |                                                                                                                 |
| Participants        | 13* | (a) Report numbers of individuals at each stage of study—eg numbers potentially eligible, examined for eligibility, confirmed eligible, included in the study, completing follow-up, and analysed            | See first paragraph of Results section: recruitment rates of school boards, schools, and students are included. |
|                     |     | (b) Give reasons for non-participation at each stage                                                                                                                                                         | See first paragraph of Results section                                                                          |
|                     |     | (c) Consider use of a flow diagram                                                                                                                                                                           | Not included.                                                                                                   |
| Descriptive data    | 14* | (a) Give characteristics of study participants (eg demographic, clinical, social) and information on exposures and potential confounders                                                                     | See Table 1 and second paragraph of Results section                                                             |
|                     |     | (b) Indicate number of participants with missing data for each variable of interest                                                                                                                          | See Table 1                                                                                                     |
| Outcome data        | 15* | Report numbers of outcome events or summary measures                                                                                                                                                         | See Tables 1-5.                                                                                                 |
| Main results        | 16  | (a) Give unadjusted estimates and, if applicable, confounder-adjusted estimates and their precision (eg, 95% confidence interval). Make clear which confounders were adjusted for and why they were included | See Tables 2-5, and Results section                                                                             |
|                     |     | (b) Report category boundaries when continuous variables were categorized                                                                                                                                    | No continuous variables were used.                                                                              |
|                     |     | (c) If relevant, consider translating estimates of relative risk into absolute risk for a meaningful time period                                                                                             | N/A                                                                                                             |
| Other analyses      | 17  | Report other analyses done—eg analyses of subgroups and interactions, and sensitivity analyses                                                                                                               | N/A                                                                                                             |
| Discussion          |     |                                                                                                                                                                                                              |                                                                                                                 |
| Key results         | 18  | Summarise key results with reference to study objectives                                                                                                                                                     | See Interpretation section, paragraph 1                                                                         |
| Limitations         | 19  | Discuss limitations of the study, taking into account sources of potential bias or                                                                                                                           | See Interpretation section, paragraph 4                                                                         |

|                          |    |                                                                                                                                                                            |                                         |
|--------------------------|----|----------------------------------------------------------------------------------------------------------------------------------------------------------------------------|-----------------------------------------|
|                          |    | imprecision. Discuss both direction and magnitude of any potential bias                                                                                                    |                                         |
| Interpretation           | 20 | Give a cautious overall interpretation of results considering objectives, limitations, multiplicity of analyses, results from similar studies, and other relevant evidence | See Interpretation section              |
| Generalisability         | 21 | Discuss the generalisability (external validity) of the study results                                                                                                      | See Interpretation section, paragraph 4 |
| <b>Other information</b> |    |                                                                                                                                                                            |                                         |
| Funding                  | 22 | Give the source of funding and the role of the funders for the present study and, if applicable, for the original study on which the present article is based              | See acknowledgements section            |

\*Give information separately for exposed and unexposed groups.

**Note:** An Explanation and Elaboration article discusses each checklist item and gives methodological background and published examples of transparent reporting. The STROBE checklist is best used in conjunction with this article (freely available on the Web sites of PLoS Medicine at <http://www.plosmedicine.org/>, Annals of Internal Medicine at <http://www.annals.org/>, and Epidemiology at <http://www.epidem.com/>). Information on the STROBE Initiative is available at [www.strobe-statement.org](http://www.strobe-statement.org).
